# Supplementary material
Source: PubMed Central journal article supplement (PMC11071839)
Supplement: 18_2022_4521_MOESM1_ESM.pdf [file 18_2022_4521_MOESM1_ESM.pdf]

## Supplemental Appendix

### **Sertoli cell survival and barrier function are regulated by miR-181c/d-*Pafah1b1* axis during mammalian spermatogenesis**

Yue Feng<sup>1</sup>, Dake Chen<sup>1</sup>, Tiansu Wang<sup>1</sup>, Jiawei Zhou<sup>1,2</sup>, Wenning Xu<sup>1</sup>, Hao Xiong<sup>1</sup>, Rong Bai<sup>1</sup>, Shang Wu<sup>1</sup>, Jialian Li<sup>1</sup>, Fenge Li<sup>1,3\*</sup>

<sup>1</sup>Key Laboratory of Pig Genetics and Breeding of Ministry of Agriculture & Key Laboratory of Agricultural Animal Genetics, Breeding and Reproduction of Ministry of Education, Huazhong Agricultural University, Wuhan 430070, PR China

<sup>2</sup>Institute of Animal Science and Veterinary Medicine, Hubei Academy of Agricultural Sciences, Wuhan 430064, China

<sup>3</sup>The Cooperative Innovation Center for Sustainable Pig Production, Wuhan 430070, PR China

\*Correspondence: Dr. Fenge Li. Affiliation: College of Animal Science and Technology, Huazhong Agricultural University, Wuhan, 430070, PR China; ORCID: 0000-0003-3862-9114. Tel: 0086-27-87282091; Fax: 0086-27-87280408; E-mail: [lifener@mail.hzau.edu.cn](mailto:lifener@mail.hzau.edu.cn)

## Supplementary information

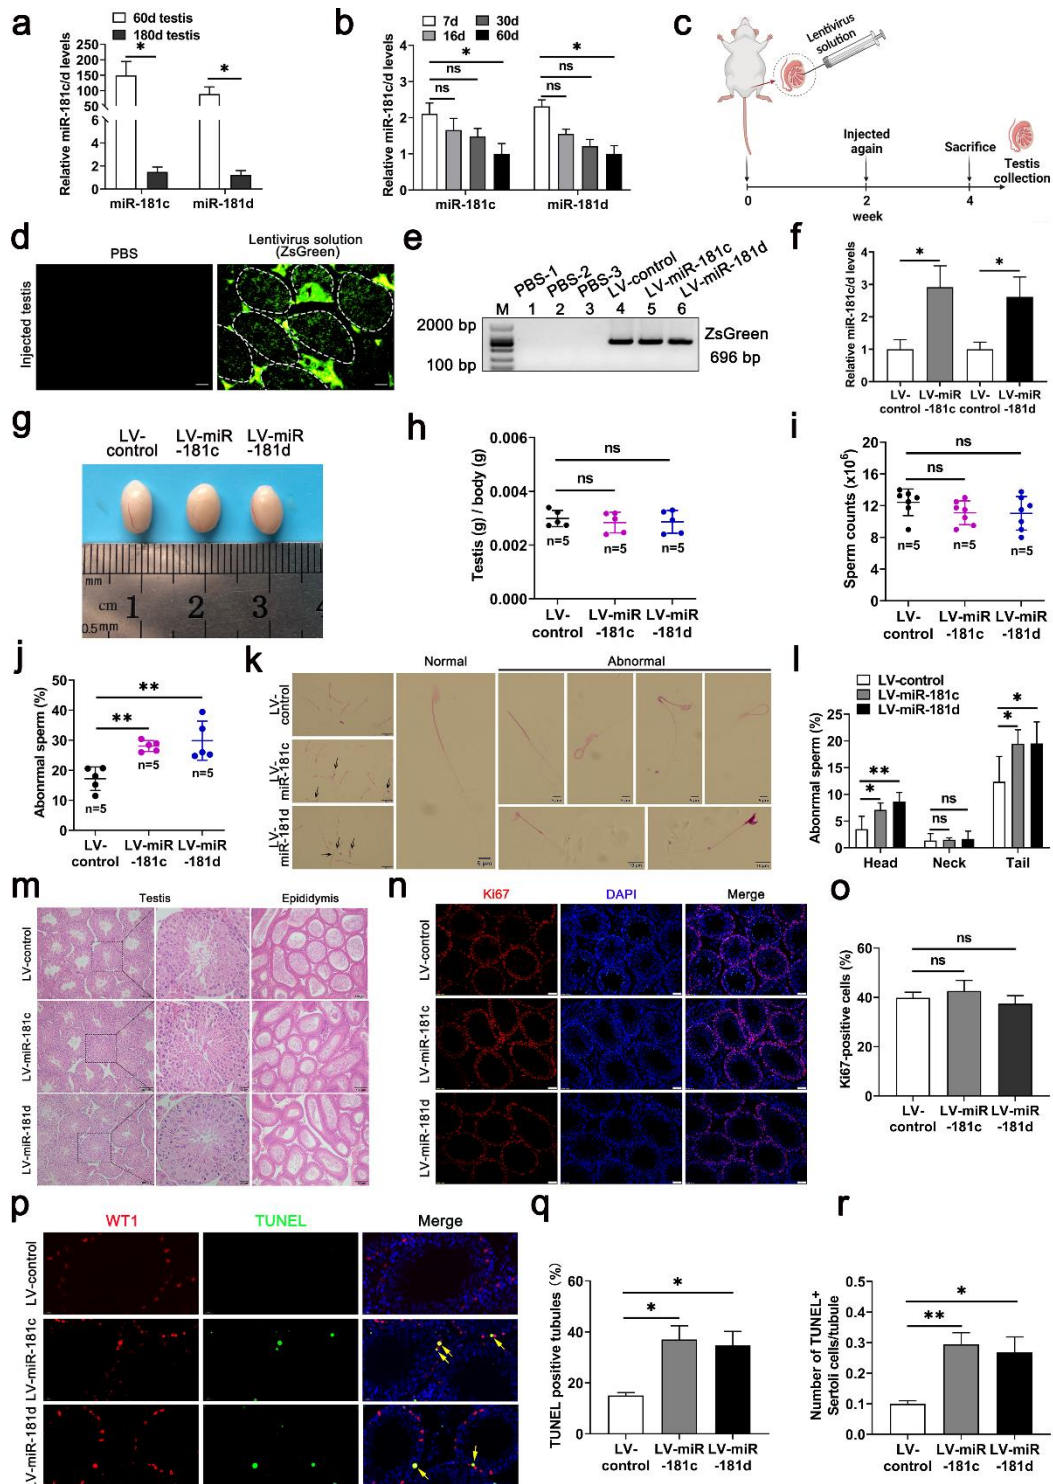

**Fig. S1** LV-miR-181c/d administration in testes increases the abnormal sperm rate and cell apoptosis.

Mice were analyzed at two weeks post the final LV-miR-181c/d administration. **a** RT-qPCR analysis of miR-181c/d levels in 60 d and 180 d porcine testis tissues. **b** RT-qPCR analysis of miR-181c/d levels in

testicular tissues of mice at different developmental stages. **c** Schematic picture showing the intratesticular injection of lentivirus solution. **d** *In-vivo* transduction efficiency of lentivirus particles. PBS served as a negative control. **e** Semi-quantitative RT-PCR analysis of ZsGreen expression in murine testes injected with PBS and lentivirus solution. PBS served as a negative control. **f** RT-qPCR analysis of miR-181c/d levels in the LV-control mice and the LV-miR-181c/d mice. **g-i** The testis size (**g**) ( $n = 5$ ), the ratio of testis weight to body weight (**h**) ( $n = 5$ ), and the sperm counts (**i**) ( $n = 5$ ). **j** The abnormal sperm rate in the LV-control mice and the LV-miR-181c/d mice. **k** Sperm morphology was detected by Giemsa staining ( $n = 5$ ). Black arrows indicate abnormal sperm. **l** The rates of head, neck, and tail deformed sperm. **m** The representative images of testicular (left panel) and epididymis (right panel) cross-sections stained with hematoxylin and eosin ( $n = 3$ ). Scale bars: 20 and 100  $\mu\text{m}$ . **n** Immunofluorescence staining of the cell proliferation marker Ki67 (red) in testes ( $n = 3$ ). Scale bar: 50  $\mu\text{m}$ . **o** Quantification of Ki67-positive cells. **p** Representative images of TUNEL (green) and WT1 (red) double immunofluorescence staining of testes sections ( $n = 3$ ). TUNEL/WT1 double-positive cells are indicated by yellow arrows. Scale bar: 20  $\mu\text{m}$ . **q** Quantification of the numbers of TUNEL-positive seminiferous tubules. **r** Quantification of the numbers of TUNEL-positive Sertoli cells per seminiferous tubule. Data are presented as mean  $\pm$  SD of at least three independent experiments. \* $p < 0.05$ ; \*\* $p < 0.01$ ; ns, not significant

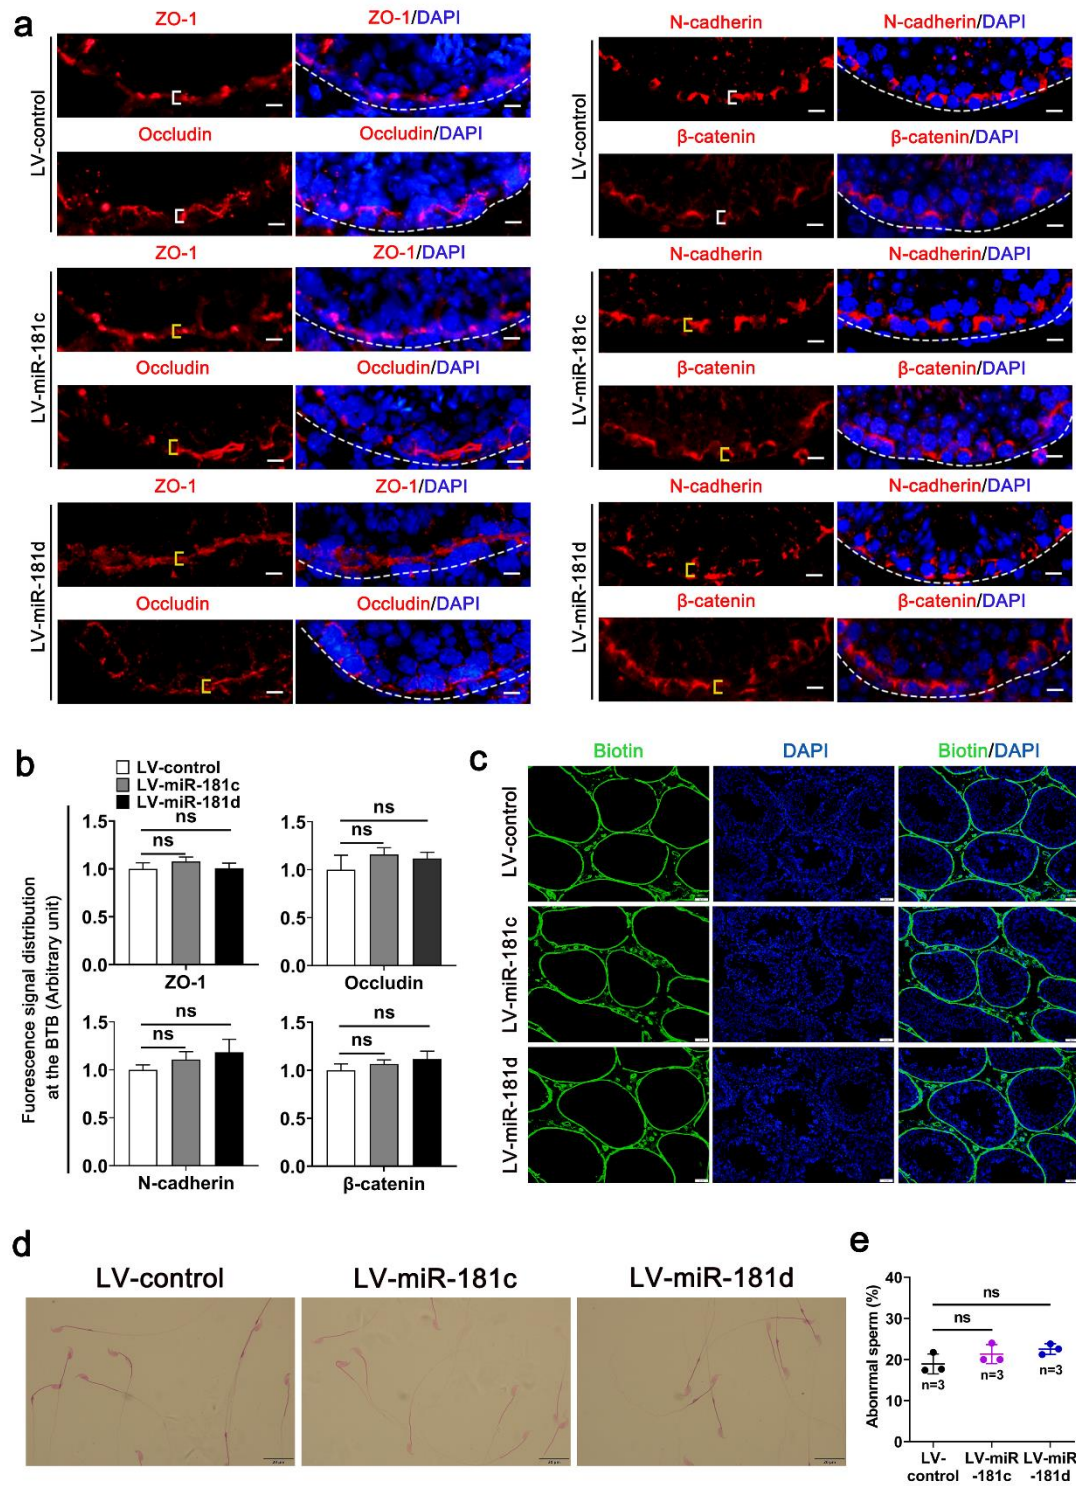

**Fig. S2 Disturbed BTB function induced by LV-miR-181c/d administration in testes is not permanent.**

Mice were analyzed at six weeks post the final LV-miR-181c/d administration. **a** Immunofluorescence staining of TJ proteins (red) and basal ES proteins (red) in testes ( $n = 3$ ). These proteins are tightly localized at the BTB near the basement membrane (dashed white line) in both the LV-control mice (white

bracket) and the LV-miR-181c/d mice (yellow brackets). Scale bar: 10  $\mu\text{m}$ . **b** Relative quantification of fluorescence signal distributed at the BTB. **c** *In vivo* BTB integrity assay ( $n = 3$ ). Scale bar: 50  $\mu\text{m}$ . **d** Sperm morphology was detected by Giemsa staining ( $n = 3$ ). **e** The abnormal sperm rate in the LV-control mice and the LV-miR-181c/d mice at six weeks post the final LV-miR-181c/d administration. Data are presented as mean  $\pm$  SD ( $n = 3$ ). ns, not significant

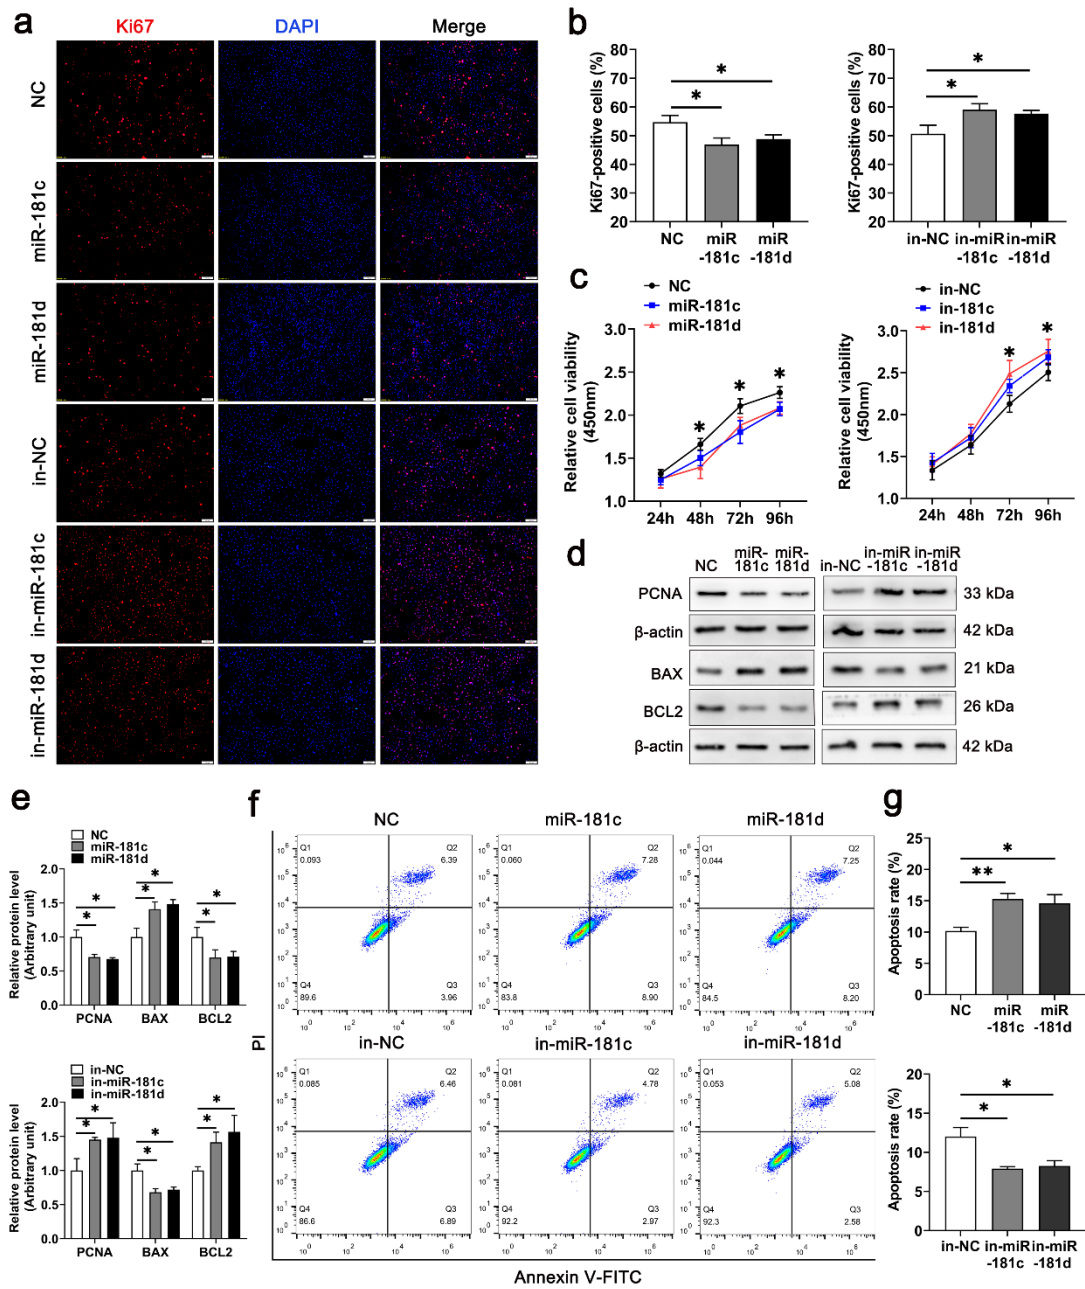

**Fig. S3 miR-181c/d inhibits proliferation and promotes apoptosis of porcine ST cells.**

The porcine ST cells were transfected with mimics NC, miR-181c/d mimics, inhibitors NC, or miR-181c/d inhibitors. miR-181c mimics, miR-181d mimics, and mimics NC are abbreviated to miR-181c, miR-181d, and NC, respectively. miR-181c inhibitors, miR-181d inhibitors, and inhibitors NC are abbreviated to in-miR-181c, in-miR-181d, and in-NC, respectively. **a** Immunofluorescence staining of Ki67 (red) in miR-181c/d mimics or inhibitors treated porcine ST cells. Scale bar: 100  $\mu$ m. **b** Quantification of Ki67-positive cells in miR-181c/d mimics or inhibitors treated porcine ST cells. **c** CCK-8 assay performed in miR-181c/d mimics or inhibitors treated porcine ST cells. **d** Western blot analysis

of PCNA, BAX, and BCL2 in miR-181c/d mimics or inhibitors treated porcine ST cells. The quantification of protein level is shown in the bar graph (e). f Annexin V-FITC/PI and flow cytometry analysis was used to examine cell apoptotic rate in miR-181c/d mimics or inhibitors treated porcine ST cells. g Quantification of cell apoptotic rate in miR-181c/d mimics or inhibitors treated porcine ST cells. Data are presented as mean  $\pm$  SD of at least three independent experiments. \* $p < 0.05$ ; \*\* $p < 0.01$



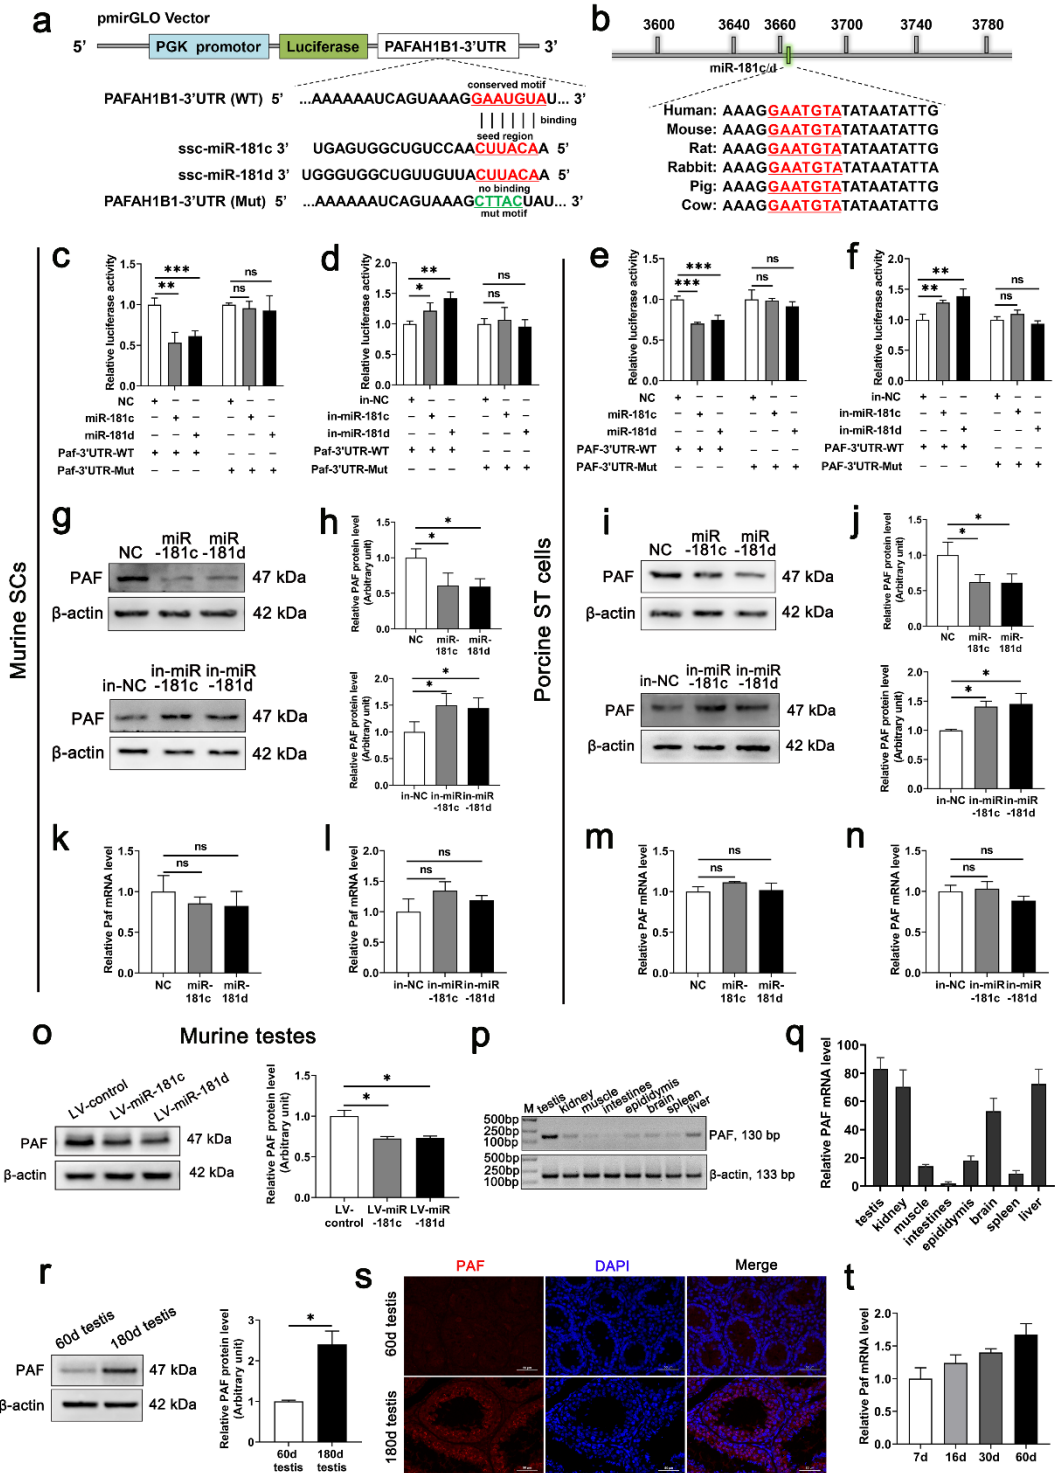

**Fig. S4** *Pafah1b1* gene is a target of miR-181c/d in Sertoli cells.

The Sertoli cells (murine SCs and porcine ST cells) were transfected with mimics NC, miR-181c/d mimics, inhibitors NC, or miR-181c/d inhibitors. *Pafah1b1* is abbreviated to Paf; PAFAH1B1 is abbreviated to PAF. **a** Schematic representation of the *PAFAH1B1* 3' UTR and its miR-181c/d-binding sites. **b** The predicted sequences to the seed regions of miR-181c/d within the *PAFAH1B1* 3' UTR are



conserved across species. Red bases indicate the conserved sequence. **c-f** Dual-luciferase reporter assay was performed to confirm the binding of miR-181c/d and *Pafah1b1* 3' UTR in murine SCs (**c, d**) and porcine ST cells (**e, f**). **g-j** Western blot analysis and quantification of PAFAH1B1 protein in murine SCs (**g, h**) or porcine ST cells (**i, j**). **k-n** RT-qPCR analysis of *Pafah1b1* mRNA in murine SCs (**k, l**) or porcine ST cells (**m, n**). **o** Western blot analysis and quantification of PAFAH1B1 protein in LV-miR-181c/d treated murine testes. **p, q** Semi-quantitative RT-PCR (**p**) and RT-qPCR (**q**) analysis of *PAFAH1B1* level in multiple tissues of Large White boars. **r, s** Western blot (**r**) and immunofluorescence staining (**s**) were performed to examine the expression of PAFAH1B1 in testes from 60 d and 180 d Large White boars. Scale bar: 50  $\mu$ m. **t** RT-qPCR analysis of *Pafah1b1* levels in testicular tissues of mice at different developmental stages. Data are presented as mean  $\pm$  SD of at least three independent experiments. \* $p < 0.05$ ; \*\* $p < 0.01$ ; \*\*\* $p < 0.001$ ; ns, not significant

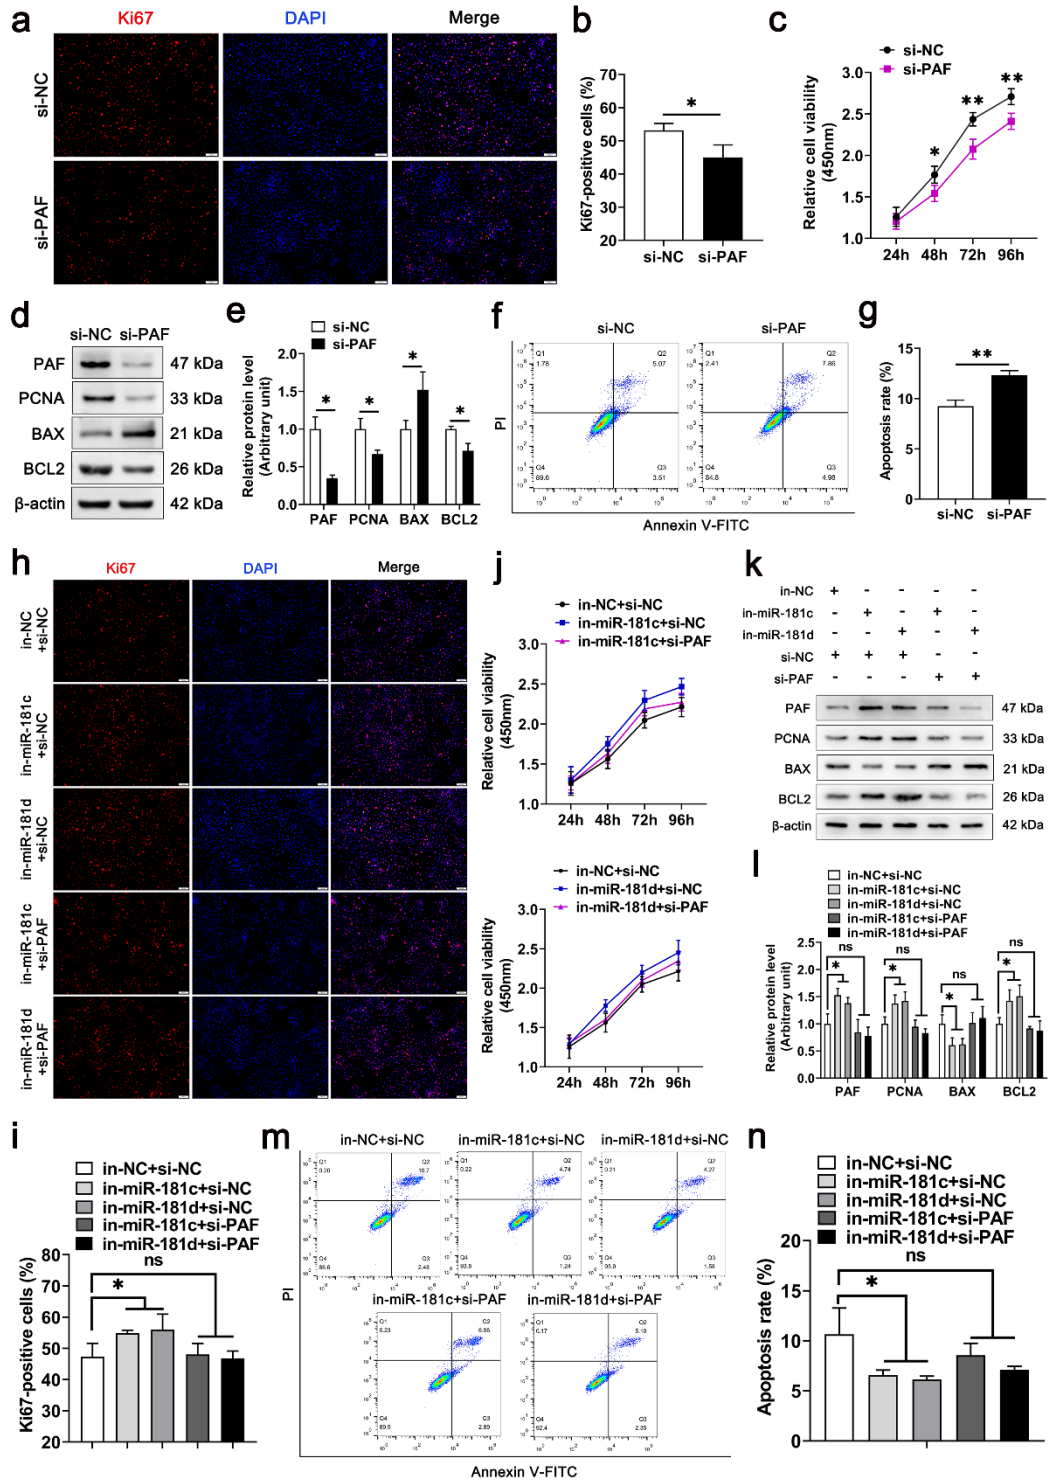

**Fig. S5** *PAFAH1B1* knockdown reverses the pro-growth of miR-181c/d inhibited porcine ST cells. The porcine ST cells were transfected with NC siRNA or *PAFAH1B1* siRNA. *PAFAH1B1* is abbreviated to PAF. **a** Immunofluorescence staining of Ki67 (red) in *PAFAH1B1* siRNA treated porcine ST cells. Scale bar: 100  $\mu$ m. **b** Quantification of Ki67-positive cells in *PAFAH1B1* siRNA treated porcine ST cells. **c** CCK-8 assay performed in *PAFAH1B1* siRNA treated porcine ST cells. **d** Western blot analysis of

PFAFH1B1, PCNA, BAX, and BCL2 in *PFAFH1B1* siRNA treated porcine ST cells. The quantification of protein level is shown in the bar graph (e). **f** Annexin V-FITC/PI and flow cytometry analysis was used to examine cell apoptotic rate in *PFAFH1B1* siRNA treated porcine ST cells. **g** Quantification of cell apoptotic rate in *PFAFH1B1* siRNA treated porcine ST cells. Five co-transfection treatments were constructed in this experiment, including inhibitors NC + NC siRNA, miR-181c inhibitors + NC siRNA, miR-181d inhibitors + NC siRNA, miR-181c inhibitors + *PFAFH1B1* siRNA, and miR-181d inhibitors + *PFAFH1B1* siRNA. **h-j** Ki67 staining (**h**) and CCK-8 (**j**) assay were performed in porcine ST cells treated with co-transfections. Quantification of Ki67-positive porcine ST cells treated with co-transfections (**i**). Scale bar: 100  $\mu$ m. **k** Western blot analysis of PFAFH1B1, PCNA, BAX, and BCL2 in porcine ST cells treated with co-transfections. The quantification of protein level is shown in the bar graph (**l**). **m** Annexin V-FITC/PI and flow cytometry analysis was used to examine cell apoptotic rate in porcine ST cells treated with co-transfections. **n** Quantification of cell apoptotic rate in porcine ST cells treated with co-transfections. Data are presented as mean  $\pm$  SD of at least three independent experiments. \* $p < 0.05$ ; \*\* $p < 0.01$ ; ns, not significant

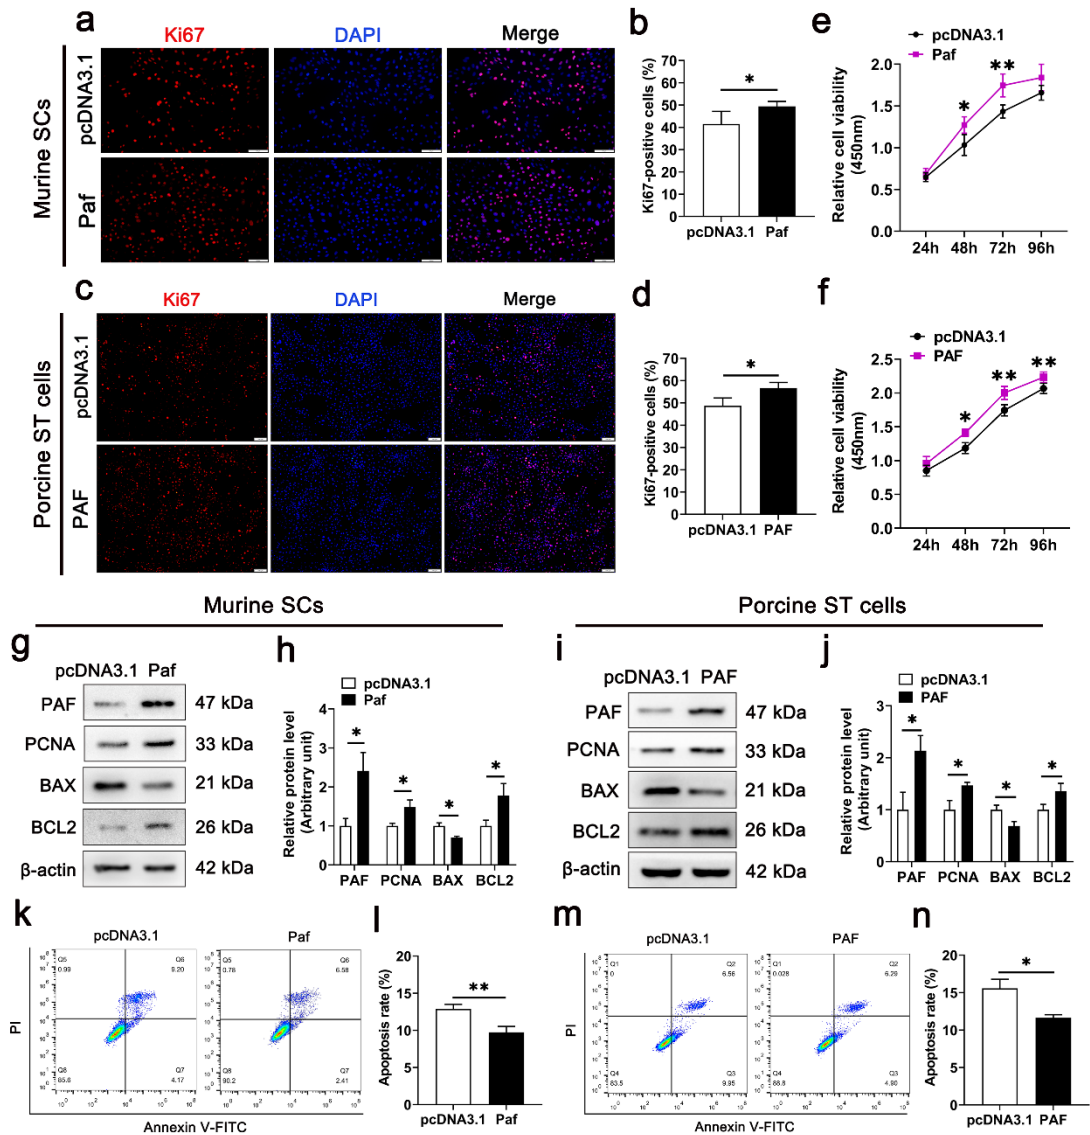

**Fig. S6 Overexpression of *Pafah1b1* promotes proliferation and inhibits apoptosis of Sertoli cells.**

The Sertoli cells (murine SCs and porcine ST cells) were transfected with *pcDNA3.1*, *pcDNA3.1-Pafah1b1*, or *pcDNA3.1-PAFAH1B1*, respectively. *pcDNA3.1-Pafah1b1* is abbreviated to Paf, *pcDNA3.1-PAFAH1B1* is abbreviated to PAF. **a, c** Immunofluorescence staining of Ki67 (red) in murine SCs (**a**) and porcine ST cells (**c**). Scale bar: 100  $\mu$ m. **b, d** Quantification of Ki67-positive cells. **e, f** CCK-8 assay performed in murine SCs (**e**) and porcine ST cells (**f**). **g-j** Western blot analysis and quantification of PAFAH1B1, PCNA, BAX, and BCL2 protein in murine SCs (**g, h**) or porcine ST cells (**i, j**). **k, m** Annexin V-FITC/PI and flow cytometry analysis was used to examine cell apoptotic rate in murine SCs (**k**) and porcine ST cells (**m**). **l, n** The quantification of cell apoptotic rate. Data are presented as mean  $\pm$  SD of at least three independent experiments. \* $p < 0.05$ ; \*\* $p < 0.01$
